# Supplementary material for: Transport of Magnesium by a Bacterial Nramp-Related Gene
Source: PubMed Central journal article supplement (PMC4072509; doi:10.1371/journal.pgen.1004429), 2014-06-26
Supplement: pgen.1004429.s004.pdf [file pgen.1004429.s004.pdf]

Table with 4 columns: Gene Name, Protein Name, Accession Number, and Score. Rows include Mnth-A, Mnth-B, Mnth-C, Outgroup Prototype, and Magnesium Archetype. Proteins listed include Mnth\_Thetin, D5ANL2 Rhocb, I6ACB8 Burth, E9ZH33 Myctu, Mnth\_Deira, Mnth\_Ecose, R7AFU0 P9Bace, Q8KDN5 Chl2e, Q8R8X2 Thetn, Mnth\_Xancp, F7UH50 Rhrld, J7PE77 L1smn, D7VD41 Lacpn, H3P03 Lacpn, Q8D383 Wlgrb, D8MZLO Ralsl, E2MDJ4 Pseub, I6AFJ6 Burth, F6VMS4 Cioin, Q7Q7L5 Anoga, B8CFC6 Thaps, NRAM2 Arath, NRAM1 Arath, Q97177 Cloab, Q97D21 Cloab, C1F4D5 Acic5, A5G362 Geour, Q7D21 Metso, C7GXH9 Yeas2, N1NXC6 Yeas5, B5VJ1 Yeas6, Q5K00 Chrye, Q8LKG7 Crln, Q0C00 Hfyna, F7UH50 Rhrld, L7CE81 Rhobt, Q8ESA4 Oceih, I5HEG8 Ecolx, BRAB Pseae, Q46296 Clopf, T5LMJ0 Strau, Q97500 Strpn, C2HE60 Entfl.

Table with 4 columns: Gene Name, Protein Name, Accession Number, and Score. Rows include Mnth-A, Mnth-B, Mnth-C, Outgroup Prototype, and Magnesium Archetype. Proteins listed include Mnth\_Thetin, D5ANL2 Rhocb, I6ACB8 Burth, E9ZH33 Myctu, Mnth\_Deira, Mnth\_Ecose, R7AFU0 P9Bace, Q8KDN5 Chl2e, Q8R8X2 Thetn, Mnth\_Xancp, F7UH50 Rhrld, J7PE77 L1smn, D7VD41 Lacpn, H3P03 Lacpn, Q8D383 Wlgrb, D8MZLO Ralsl, E2MDJ4 Pseub, I6AFJ6 Burth, F6VMS4 Cioin, B8CFC6 Thaps, NRAM2 Arath, NRAM1 Arath, Q97177 Cloab, Q97D21 Cloab, C1F4D5 Acic5, A5G362 Geour, A4X1U1 Cal58, D7D21 Metso, C7GXH9 Yeas2, N1NXC6 Yeas5, B5VJ1 Yeas6, Q5K00 Chrye, Q8LKG7 Crln, Q0C00 Hfyna, F7UH50 Rhrld, L7CE81 Rhobt, Q8ESA4 Oceih, I5HEG8 Ecolx, BRAB Pseae, Q46296 Clopf, T5LMJ0 Strau, Q97500 Strpn, C2HE60 Entfl.

Table with 4 columns: Gene Name, Protein Name, Accession Number, and Score. Rows include Mnth-A, Mnth-B, Mnth-C, Outgroup Prototype, and Magnesium Archetype. Proteins listed include Mnth\_Thetin, D5ANL2 Rhocb, I6ACB8 Burth, E9ZH33 Myctu, Mnth\_Deira, Mnth\_Ecose, R7AFU0 P9Bace, Q8KDN5 Chl2e, Q8R8X2 Thetn, Mnth\_Xancp, F7UH50 Rhrld, J7PE77 L1smn, D7VD41 Lacpn, H3P03 Lacpn, Q8D383 Wlgrb, D8MZLO Ralsl, E2MDJ4 Pseub, I6AFJ6 Burth, F6VMS4 Cioin, B8CFC6 Thaps, NRAM2 Arath, NRAM1 Arath, Q97177 Cloab, Q97D21 Cloab, C1F4D5 Acic5, A5G362 Geour, A4X1U1 Cal58, D7D21 Metso, C7GXH9 Yeas2, N1NXC6 Yeas5, B5VJ1 Yeas6, Q5K00 Chrye, Q8LKG7 Crln, Q0C00 Hfyna, F7UH50 Rhrld, L7CE81 Rhobt, Q8ESA4 Oceih, I5HEG8 Ecolx, BRAB Pseae, Q46296 Clopf, T5LMJ0 Strau, Q97500 Strpn, C2HE60 Entfl.
